# Supplementary material for: Linkage but Not Association of Calpain-10 to Type 2 Diabetes Replicated in Northern Sweden
Source: Oxford University Press journal article supplement (doi:10.2337/db05-1495), 2006-05-26
Supplement: db051495-sup-db1495onlineappendix1.doc [file db051495-sup-db1495onlineappendix1.doc]

Supplementary Table 1: Power calculation for haplotype and SNP association analysis as a function of at-risk variant frequencies and genotypic relative risks.

The power analysis has been carried out by the Genetic Power Calculator (available at <http://pngu.mgh.harvard.edu/~purcell/gpc/>) using a multiplicative model for the risk, a R2 value of 1, a prevalence of 0.03 and a type 1 error rate of 0.05.
